# Supplementary material
Source: PubMed Central journal article supplement (PMC6191182)
Supplement: NIHMS1508389-supplement-Supp1.pdf [file NIHMS1508389-supplement-Supp1.pdf]

|                                                                                                                                                                                                                                                                                                                                                                                                                                        |
|----------------------------------------------------------------------------------------------------------------------------------------------------------------------------------------------------------------------------------------------------------------------------------------------------------------------------------------------------------------------------------------------------------------------------------------|
| <b>Supplemental Table 1A.</b> Final list of independent variables included in the regression analysis                                                                                                                                                                                                                                                                                                                                  |
| <b>Treatment Assignment:</b> combined treatment, sertraline, cognitive behavioral therapy, placebo                                                                                                                                                                                                                                                                                                                                     |
| <b>Demographic Variables</b>                                                                                                                                                                                                                                                                                                                                                                                                           |
| Sex                                                                                                                                                                                                                                                                                                                                                                                                                                    |
| Ethnicity (Hispanic vs not Hispanic)                                                                                                                                                                                                                                                                                                                                                                                                   |
| Race (White vs non-White)                                                                                                                                                                                                                                                                                                                                                                                                              |
| Age                                                                                                                                                                                                                                                                                                                                                                                                                                    |
| Socioeconomic Status (SES; Hollingshead Two Factor Scale)                                                                                                                                                                                                                                                                                                                                                                              |
| Full Scale IQ (Tellegen and Briggs Formula)                                                                                                                                                                                                                                                                                                                                                                                            |
| <b>Child Rated Variables</b>                                                                                                                                                                                                                                                                                                                                                                                                           |
| SCARED-C Subscales: Panic, Generalized Anxiety, Separation Anxiety, Social Phobia, School Anxiety                                                                                                                                                                                                                                                                                                                                      |
| Bias to threat (child rated Ambiguous Situations Questionnaire, ASQ-C)                                                                                                                                                                                                                                                                                                                                                                 |
| Child coping ability (child rated Coping Questionnaire, CQ-C)                                                                                                                                                                                                                                                                                                                                                                          |
| Depressive symptoms (child rated Mood and Feelings Questionnaire, MFQ-C)                                                                                                                                                                                                                                                                                                                                                               |
| Child rated Child Anxiety Impact Scale (CAIS-C)                                                                                                                                                                                                                                                                                                                                                                                        |
| Family functioning (child rated Brief Family Assessment Measure, BFAM-C)                                                                                                                                                                                                                                                                                                                                                               |
| Child treatment expectancy                                                                                                                                                                                                                                                                                                                                                                                                             |
| <b>Parent Rated Variables</b>                                                                                                                                                                                                                                                                                                                                                                                                          |
| SCARED-P Subscales: Panic, Generalized Anxiety, Separation Anxiety, Social Phobia, School Anxiety                                                                                                                                                                                                                                                                                                                                      |
| Child bias to threat (ASQ-P)                                                                                                                                                                                                                                                                                                                                                                                                           |
| Child coping ability (CQ-P)                                                                                                                                                                                                                                                                                                                                                                                                            |
| Child depressive symptoms (MFQ-P)                                                                                                                                                                                                                                                                                                                                                                                                      |
| Child anxiety impact (CAIS-P)                                                                                                                                                                                                                                                                                                                                                                                                          |
| Child Behavior Checklist (CBCL) for ages 6-18 Subscales: Social Problems, Thought Problems, Attention Problems, Rule-Breaking Behavior, Aggressive Behavior                                                                                                                                                                                                                                                                            |
| Parent psychopathology (parent rated Brief Symptom Inventory (BSI) Global Severity)                                                                                                                                                                                                                                                                                                                                                    |
| Family burden related to the child's anxiety (parent rated Family Burden Assessment Scale (FBAS))                                                                                                                                                                                                                                                                                                                                      |
| Family functioning (BFAM-P)                                                                                                                                                                                                                                                                                                                                                                                                            |
| Parent treatment expectancy                                                                                                                                                                                                                                                                                                                                                                                                            |
| <b>Independent Evaluator Assessed Variables</b>                                                                                                                                                                                                                                                                                                                                                                                        |
| Child psychiatric diagnoses based on the ADIS-C/P: generalized anxiety disorder (GAD), social phobia (SOP), separation anxiety disorder (SAD), selective mutism, obsessive-compulsive disorder, post-traumatic stress disorder, major depressive disorder, attention deficit hyperactivity disorder, tic disorder, pervasive developmental disorder, oppositional defiant disorder (each coded individually as present vs not present) |
| Total number of psychiatric diagnoses (excluding GAD, SOP, SAD)                                                                                                                                                                                                                                                                                                                                                                        |
| Pediatric Anxiety Rating Scale                                                                                                                                                                                                                                                                                                                                                                                                         |
| Child global functioning (Children's Global Assessment Scale)                                                                                                                                                                                                                                                                                                                                                                          |

Note: -C = child rated; -P = parent rated; SCARED = Screen for Childhood Anxiety Related Emotional Disorders.

**Supplemental Table 1B.** Significant Predictors and Moderators of Child Anxiety Severity after 12 Weeks of Treatment in Stepwise Multiple Linear Regression Analysis Stratified by Informant and Domain of Predictor or Moderator Variables.

| Child Informant Outcome (SCARED) |       |      |       |       | Parent Informant Outcome (SCARED) |        |       |       |        | Independent Evaluator Outcome (PARS) |       |       |       |        |
|----------------------------------|-------|------|-------|-------|-----------------------------------|--------|-------|-------|--------|--------------------------------------|-------|-------|-------|--------|
|                                  | ES    | SE   | t     | p     |                                   | ES     | SE    | t     | p      |                                      | ES    | SE    | t     | p      |
| <b>DEMOGRAPHIC</b>               |       |      |       |       | <b>DEMOGRAPHIC</b>                |        |       |       |        | <b>DEMOGRAPHIC</b>                   |       |       |       |        |
| SES                              | -1.34 | 0.64 | -2.11 | 0.04  | AGE                               | 0.03   | 0.02  | 2.10  | 0.04   | AGE                                  | 0.02  | 0.01  | 2.22  | 0.03   |
| AGE X TX                         |       |      |       |       | SES                               | -1.57  | 0.64  | -2.45 | 0.01   | SES                                  | -0.77 | 0.31  | -2.50 | 0.01   |
| COMB                             | -0.12 | 0.06 | -2.26 | 0.02  | SES X TX                          |        |       |       |        | HISPANIC X TX                        |       |       |       |        |
| AGE                              | 0.01  | 0.02 | 0.67  | 0.50  | SRT                               | 4.19   | 2.09  | 2.01  | 0.05   | CBT                                  | 6.55  | 2.93  | 2.23  | 0.03   |
|                                  |       |      |       |       | HISPANIC X TX                     |        |       |       |        | HISPANIC                             | -0.55 | 0.98  | -0.57 | 0.57   |
|                                  |       |      |       |       | SRT                               | 15.29  | 7.28  | 2.10  | 0.04   |                                      |       |       |       |        |
|                                  |       |      |       |       | HISPANIC                          | -0.28  | 2.00  | -0.14 | 0.89   |                                      |       |       |       |        |
| <b>CHILD RATED</b>               |       |      |       |       | <b>CHILD RATED</b>                |        |       |       |        | <b>CHILD RATED</b>                   |       |       |       |        |
| SCARED-C SEP                     | 0.53  | 0.15 | 3.54  | 0.00  | SCARED-C SOP                      | 0.72   | 0.13  | 5.52  | 0.00   | SCARED-C SOP                         | 0.26  | 0.07  | 3.67  | 0.00   |
| SCARED-C SOP                     | 0.53  | 0.16 | 3.37  | 0.00  | SCARED-C SEP X TX                 |        |       |       |        | CQ-C                                 | -0.51 | 0.22  | -2.37 | 0.02   |
| SCARED-C GAD                     | 0.31  | 0.15 | 2.03  | 0.04  | COMB                              | -1.22  | 0.43  | -2.84 | 0.00   | SCARED-C SAD X TX                    |       |       |       |        |
| SCARED-C GAD X TX                |       |      |       |       | SCARED-C SEP                      | -0.04  | 0.16  | -0.23 | 0.82   | COMB                                 | -0.62 | 0.28  | -2.18 | 0.03   |
| COMB                             | -1.16 | 0.48 | -2.41 | 0.02  |                                   |        |       |       |        | SCARED-C SAD                         | 0.07  | 0.08  | 0.86  | 0.39   |
| SCARED-C PAN X TX                |       |      |       |       |                                   |        |       |       |        |                                      |       |       |       |        |
| CBT                              | 0.99  | 0.50 | 1.99  | 0.05  |                                   |        |       |       |        |                                      |       |       |       |        |
| COMB                             | -1.28 | 0.46 | -2.76 | 0.01  |                                   |        |       |       |        |                                      |       |       |       |        |
| SCARED-C PAN                     | -0.03 | 0.16 | -0.22 | 0.83  |                                   |        |       |       |        |                                      |       |       |       |        |
| CAIS-C X TX                      |       |      |       |       |                                   |        |       |       |        |                                      |       |       |       |        |
| COMB                             | 0.31  | 0.16 | 1.99  | 0.05  |                                   |        |       |       |        |                                      |       |       |       |        |
| CAIS-C                           | 0.07  | 0.05 | 1.21  | 0.23  |                                   |        |       |       |        |                                      |       |       |       |        |
| MFQ-C X TX                       |       |      |       |       |                                   |        |       |       |        |                                      |       |       |       |        |
| CBT                              | -0.37 | 0.18 | -2.04 | 0.04  |                                   |        |       |       |        |                                      |       |       |       |        |
| MFQ-C                            | 0.04  | 0.06 | 0.74  | 0.46  |                                   |        |       |       |        |                                      |       |       |       |        |
| CQ-C X TX                        |       |      |       |       |                                   |        |       |       |        |                                      |       |       |       |        |
| CBT                              | -3.08 | 1.45 | -2.12 | 0.03  |                                   |        |       |       |        |                                      |       |       |       |        |
| CQ-C                             | -0.44 | 0.41 | -1.08 | 0.28  |                                   |        |       |       |        |                                      |       |       |       |        |
| ASQ-C X TX                       |       |      |       |       |                                   |        |       |       |        |                                      |       |       |       |        |
| CBT                              | -2.05 | 1.03 | -1.99 | 0.05  |                                   |        |       |       |        |                                      |       |       |       |        |
| ASQ-C                            | -0.55 | 0.33 | -1.66 | 0.10  |                                   |        |       |       |        |                                      |       |       |       |        |
| EXPC-C X TX                      |       |      |       |       |                                   |        |       |       |        |                                      |       |       |       |        |
| CBT                              | -3.08 | 1.45 | -2.12 | 0.03  |                                   |        |       |       |        |                                      |       |       |       |        |
| EXPC-C                           | 0.02  | 0.44 | 0.06  | 0.96  |                                   |        |       |       |        |                                      |       |       |       |        |
| <b>PARENT RATED</b>              |       |      |       |       | <b>PARENT RATED</b>               |        |       |       |        | <b>PARENT RATED</b>                  |       |       |       |        |
| SCARED-P SCH                     | 0.61  | 0.24 | 2.54  | 0.01  | SCARED-P SOP                      | 0.63   | 0.12  | 5.08  | <0.001 | SCARED-P SOP                         | 0.24  | 0.067 | 3.50  | <0.001 |
| SCARED-P SOP                     | 0.34  | 0.15 | 2.36  | 0.02  | SCARED-P GAD                      | 0.28   | 0.14  | 2.02  | 0.04   | CQ-P                                 | -0.64 | 0.26  | -2.50 | 0.01   |
| SCARED-P SOP X TX                |       |      |       |       | CBCL TP                           | 0.23   | 0.07  | 3.46  | <0.001 | BSI GSI X TX                         |       |       |       |        |
| COMB                             | 1.05  | 0.46 | 2.30  | 0.02  | SCARED-P SCH X TX                 |        |       |       |        | SRT                                  | -6.59 | 2.40  | -2.74 | 0.006  |
| SCARED-P PAN X TX                |       |      |       |       | CBT                               | -1.51  | 0.71  | -2.12 | 0.03   | CBT                                  | 4.39  | 2.14  | 2.05  | 0.04   |
| COMB                             | -1.19 | 0.44 | -2.72 | 0.007 | SRT                               | 2.51   | 0.74  | 3.40  | <0.001 | BSI GSI                              | 0.23  | 0.78  | 0.30  | 0.77   |
| SCARED-P PAN                     | 0.16  | 0.16 | 1.02  | 0.31  | SCARED-P SCH                      | 0.16   | 0.25  | 0.65  | 0.52   |                                      |       |       |       |        |
| SCARED-P GAD X TX                |       |      |       |       | SCARED-P PAN X TX                 |        |       |       |        |                                      |       |       |       |        |
| CBT                              | -1.26 | 0.52 | -2.41 | 0.02  | CBT                               | 1.24   | 0.39  | 3.18  | 0.002  |                                      |       |       |       |        |
| SCARED-P GAD                     | 0.03  | 0.19 | 0.15  | 0.88  | SCARED-P PAN                      | 0.24   | 0.14  | 1.72  | 0.09   |                                      |       |       |       |        |
| CAIS-P                           | 0.08  | 0.06 | 1.38  | 0.17  | CBCL RULE X TX                    |        |       |       |        |                                      |       |       |       |        |
| CAIS-P X TX                      |       |      |       |       | CBT                               | 0.71   | 0.29  | 2.43  | 0.02   |                                      |       |       |       |        |
| SRT                              | -0.69 | 0.26 | -2.61 | 0.009 | CBCL RULE                         | 0.25   | 0.12  | 2.18  | 0.03   |                                      |       |       |       |        |
| CBCL TP                          | 0.18  | 0.08 | 2.21  | 0.03  | BSI GSI                           | 3.68   | 1.34  | 2.74  | 0.007  |                                      |       |       |       |        |
| CBCL TP X TX                     |       |      |       |       | BSI GSI X TX                      |        |       |       |        |                                      |       |       |       |        |
| SRT                              | -0.71 | 0.29 | -2.50 | 0.01  | SRT                               | -14.86 | 4.28  | -3.47 | <0.001 |                                      |       |       |       |        |
| CBCL ATT                         | -0.19 | 0.09 | -2.22 | 0.03  |                                   |        |       |       |        |                                      |       |       |       |        |
| CBCL ATT X TX                    |       |      |       |       |                                   |        |       |       |        |                                      |       |       |       |        |
| SRT                              | 0.70  | 0.30 | 2.36  | 0.02  |                                   |        |       |       |        |                                      |       |       |       |        |
| CQ-P X TX                        |       |      |       |       |                                   |        |       |       |        |                                      |       |       |       |        |
| CBT                              | -3.62 | 1.64 | -2.21 | 0.03  |                                   |        |       |       |        |                                      |       |       |       |        |
| CQ-P                             | 0.60  | 0.54 | 1.12  | 0.26  |                                   |        |       |       |        |                                      |       |       |       |        |
| BSI GSI                          | 3.62  | 1.46 | 2.48  | 0.01  |                                   |        |       |       |        |                                      |       |       |       |        |
| BSI GSI X TX                     |       |      |       |       |                                   |        |       |       |        |                                      |       |       |       |        |
| SRT                              | 0.70  | 0.30 | 2.36  | 0.02  |                                   |        |       |       |        |                                      |       |       |       |        |
| <b>IE RATED</b>                  |       |      |       |       | <b>IE RATED</b>                   |        |       |       |        | <b>IE RATED</b>                      |       |       |       |        |
| GAD DX X TX                      |       |      |       |       | SOP DX                            | 3.07   | 1.32  | 2.32  | 0.02   | OCD DX                               | 2.52  | 0.98  | 2.58  | 0.01   |
| CBT                              | -9.53 | 4.47 | -2.13 | 0.03  | SELECT MUT DX                     | 10.05  | 3.84  | 2.61  | 0.009  | SELECT MUT DX X TX                   |       |       |       |        |
| GAD DX                           | 0.74  | 1.38 | 0.54  | 0.59  | SELECT MUT DX X TX                |        |       |       |        | COMB                                 | 13.70 | 5.60  | 2.45  | 0.01   |
|                                  |       |      |       |       | CBT                               | 32.97  | 12.72 | 2.59  | 0.01   | SELECT MUT DX                        | -0.09 | 2.08  | -0.04 | 0.96   |
|                                  |       |      |       |       | PTSD DX                           | 9.21   | 4.34  | 2.12  | 0.03   | ADHD DX X TX                         |       |       |       |        |
|                                  |       |      |       |       | PTSD DX X TX                      |        |       |       |        | CBT                                  | 6.22  | 3.02  | 2.06  | 0.04   |
|                                  |       |      |       |       | COMB                              | -24.56 | 11.53 | -2.13 | 0.03   | ADHD DX                              | -0.09 | 0.98  | -0.10 | 0.92   |

Note: PARS = Pediatric Anxiety Rating Scale; CBT = Cognitive Behavior Therapy; SRT = Sertraline; COMB = Combined CBT and SRT; X TX denotes an interaction with treatment arm assignment; Variables with -C are child rated and variables with -P are parent rated; HISPANIC= child of Hispanic Ethnicity; SES = Socioeconomic Status (Hollingshead Two Factor Scale); SCARED = Screen for Childhood Anxiety Related Emotional Disorders [Includes the following subscale abbreviations: SEP=Separation Anxiety, SOP=Social Phobia, GAD=Generalized Anxiety, SCH=School Anxiety; PAN=Panic]; CAIS = Child Anxiety Impact Scale; MFQ = Mood and Feelings Questionnaire; CQ = Coping Questionnaire; ASQ = Ambiguous Situations Questionnaire; EXPC = Treatment Expectancies; CBCL = Child Behavior Checklist [Includes the following subscales abbreviations: TOT=Total Problems, TP=Thought Problems, AGG=Aggressive Behavior, ATT=Attention Problems, RULE = Rule Breaking]; GAD DX = Met criteria for Generalized Anxiety Disorder; SOP DX = Met criteria for Social Phobia; SELECT MUT DX = Met criteria for Selective Mutism; PTSD DX = Met criteria for Post-Traumatic Stress Disorder; ADHD DX = Met criteria for Attention Deficit Hyperactivity Disorder; OCD DX = Met criteria for Obsessive-Compulsive Disorder; BSI GSI= Brief Symptom Inventory Global Severity Index.
