# Supplementary material
Source: PubMed Central journal article supplement (PMC6191182)

# Supplemental:

Suppl FIGURE 1A. Only patients receiving active treatment

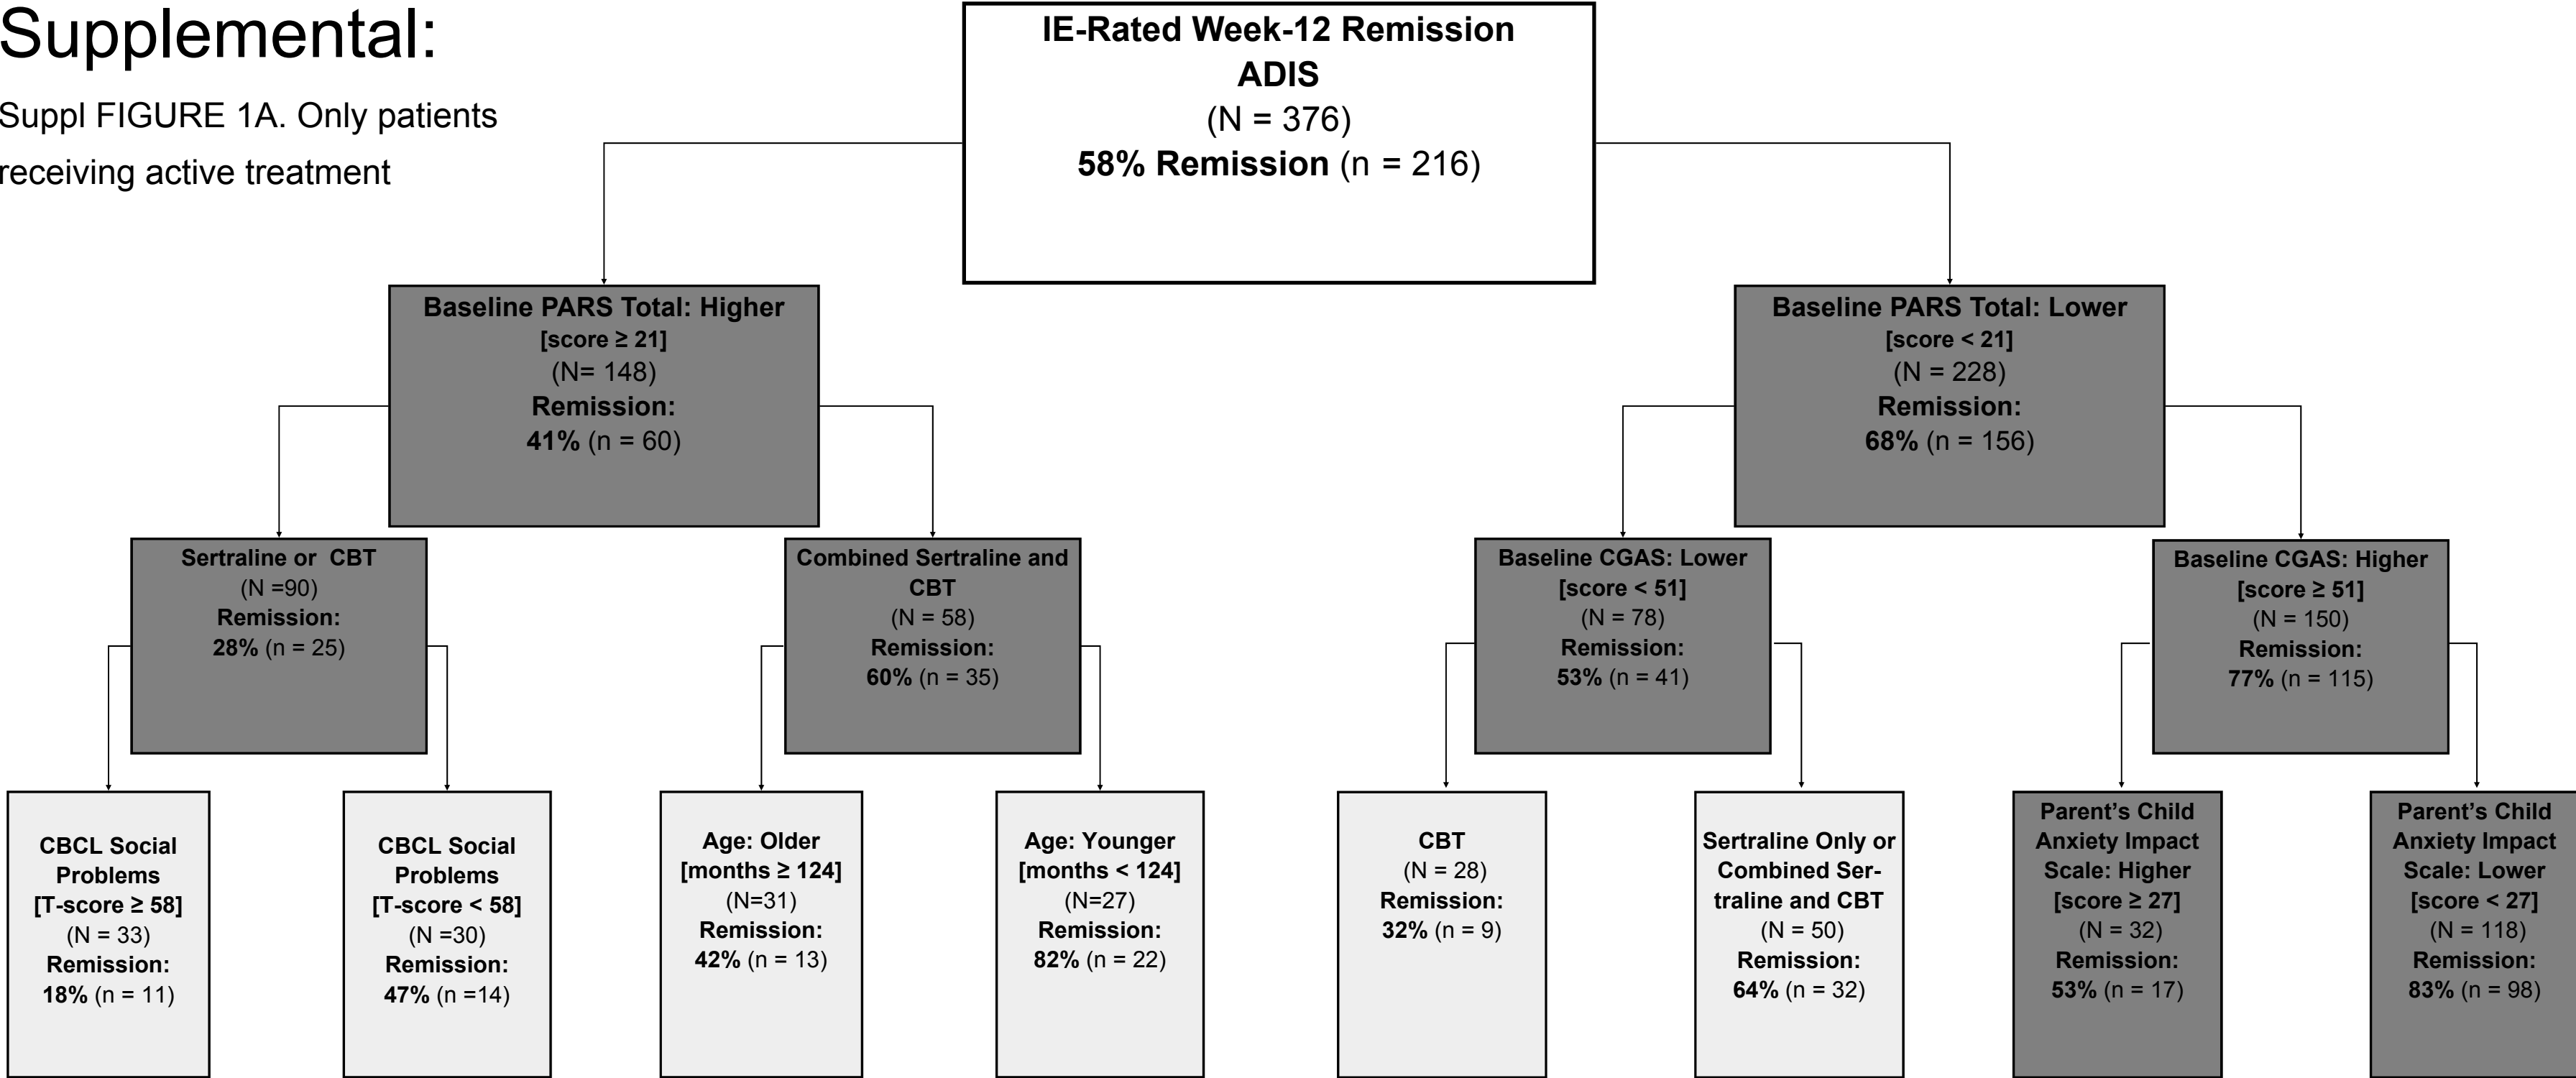

## Supplemental:

Suppl FIGURE 1B. Only patients receiving active treatment

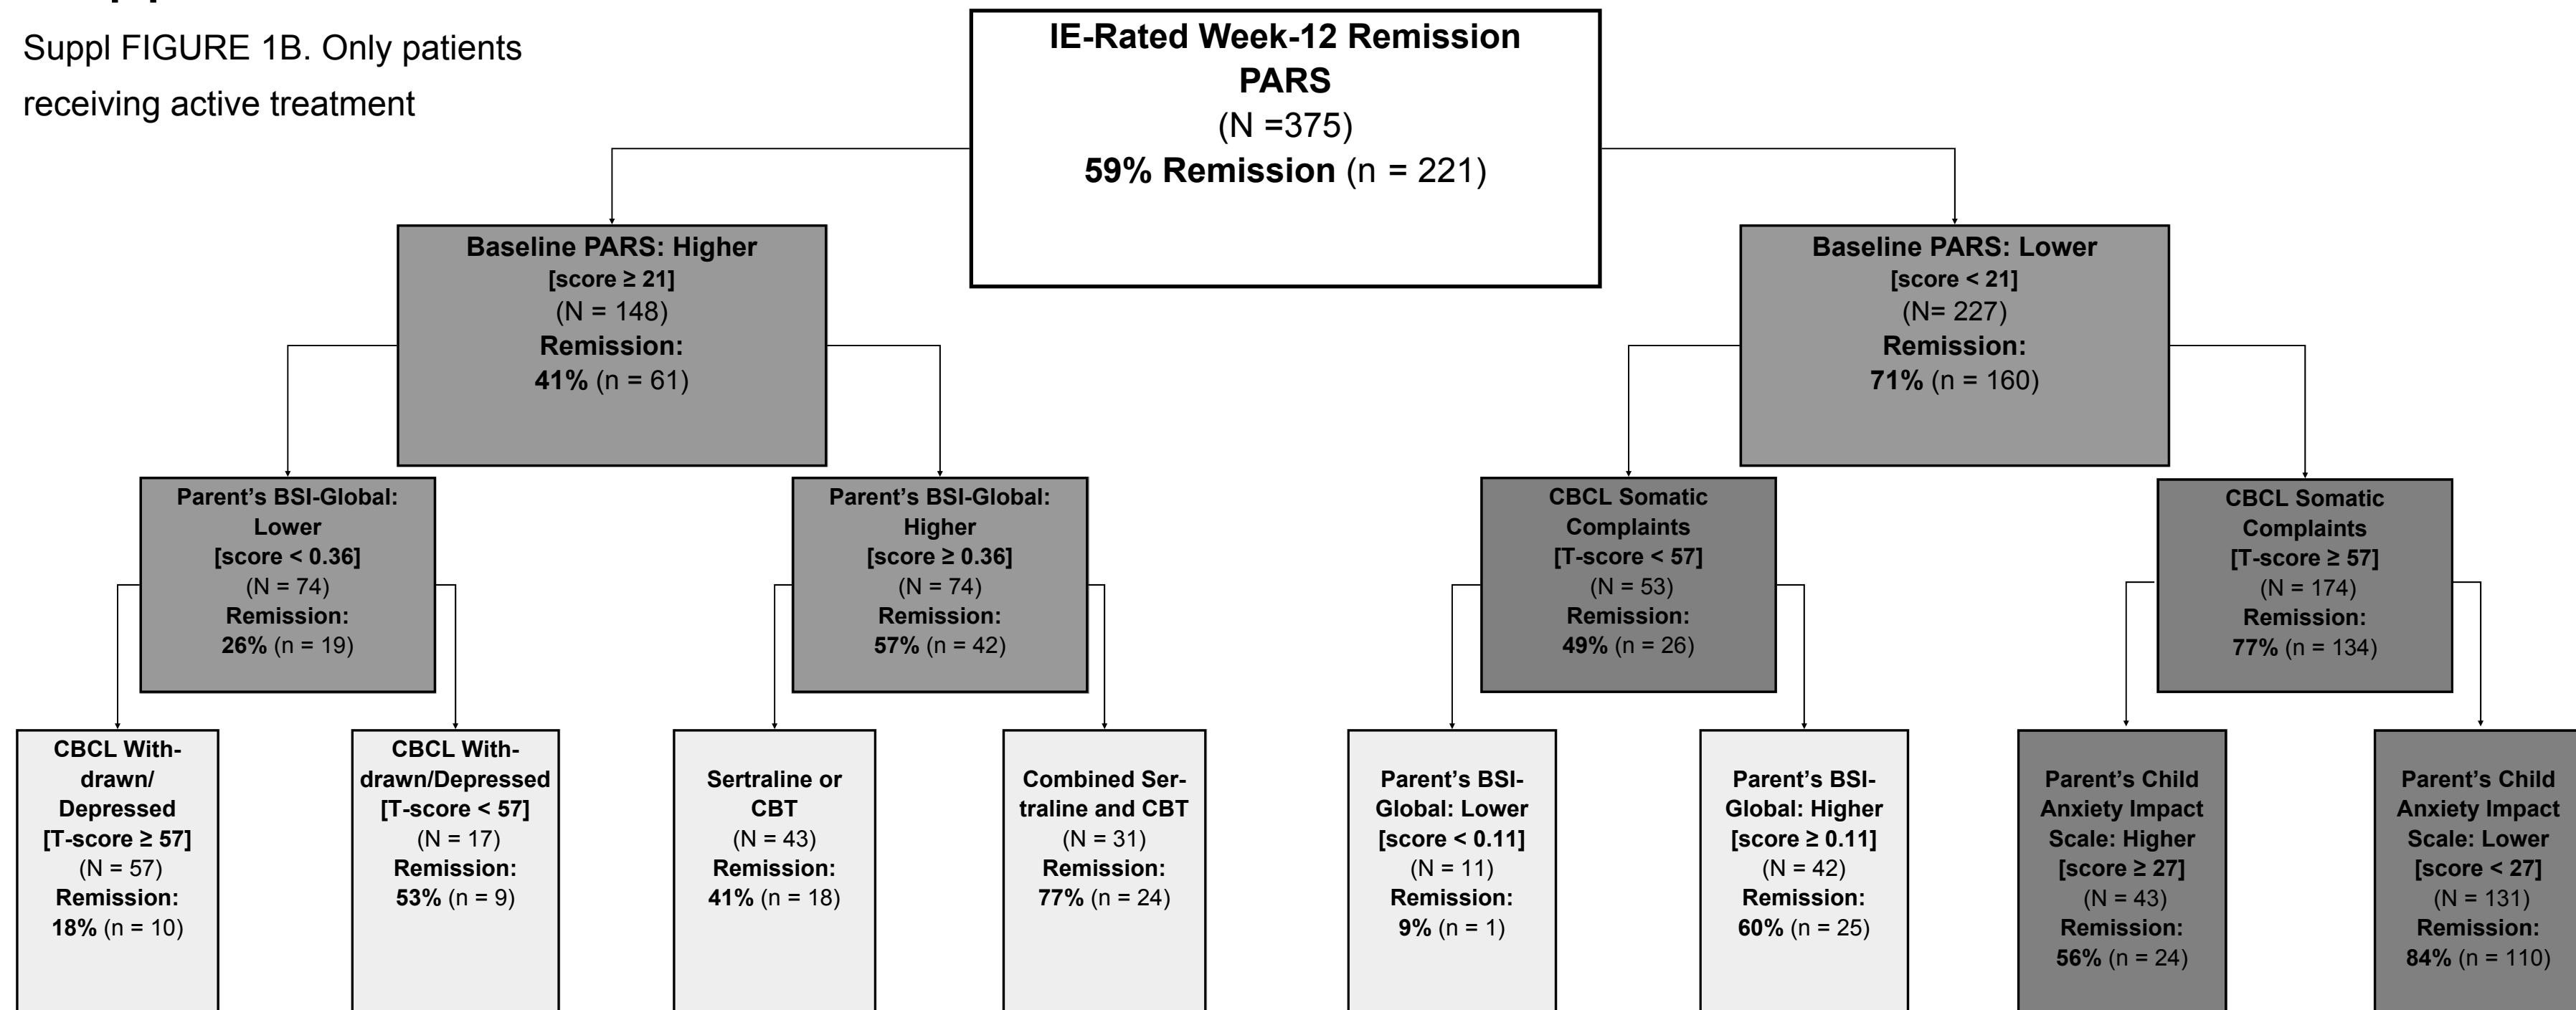

# Supplemental:

Suppl FIGURE 1C. Only patients receiving active treatment

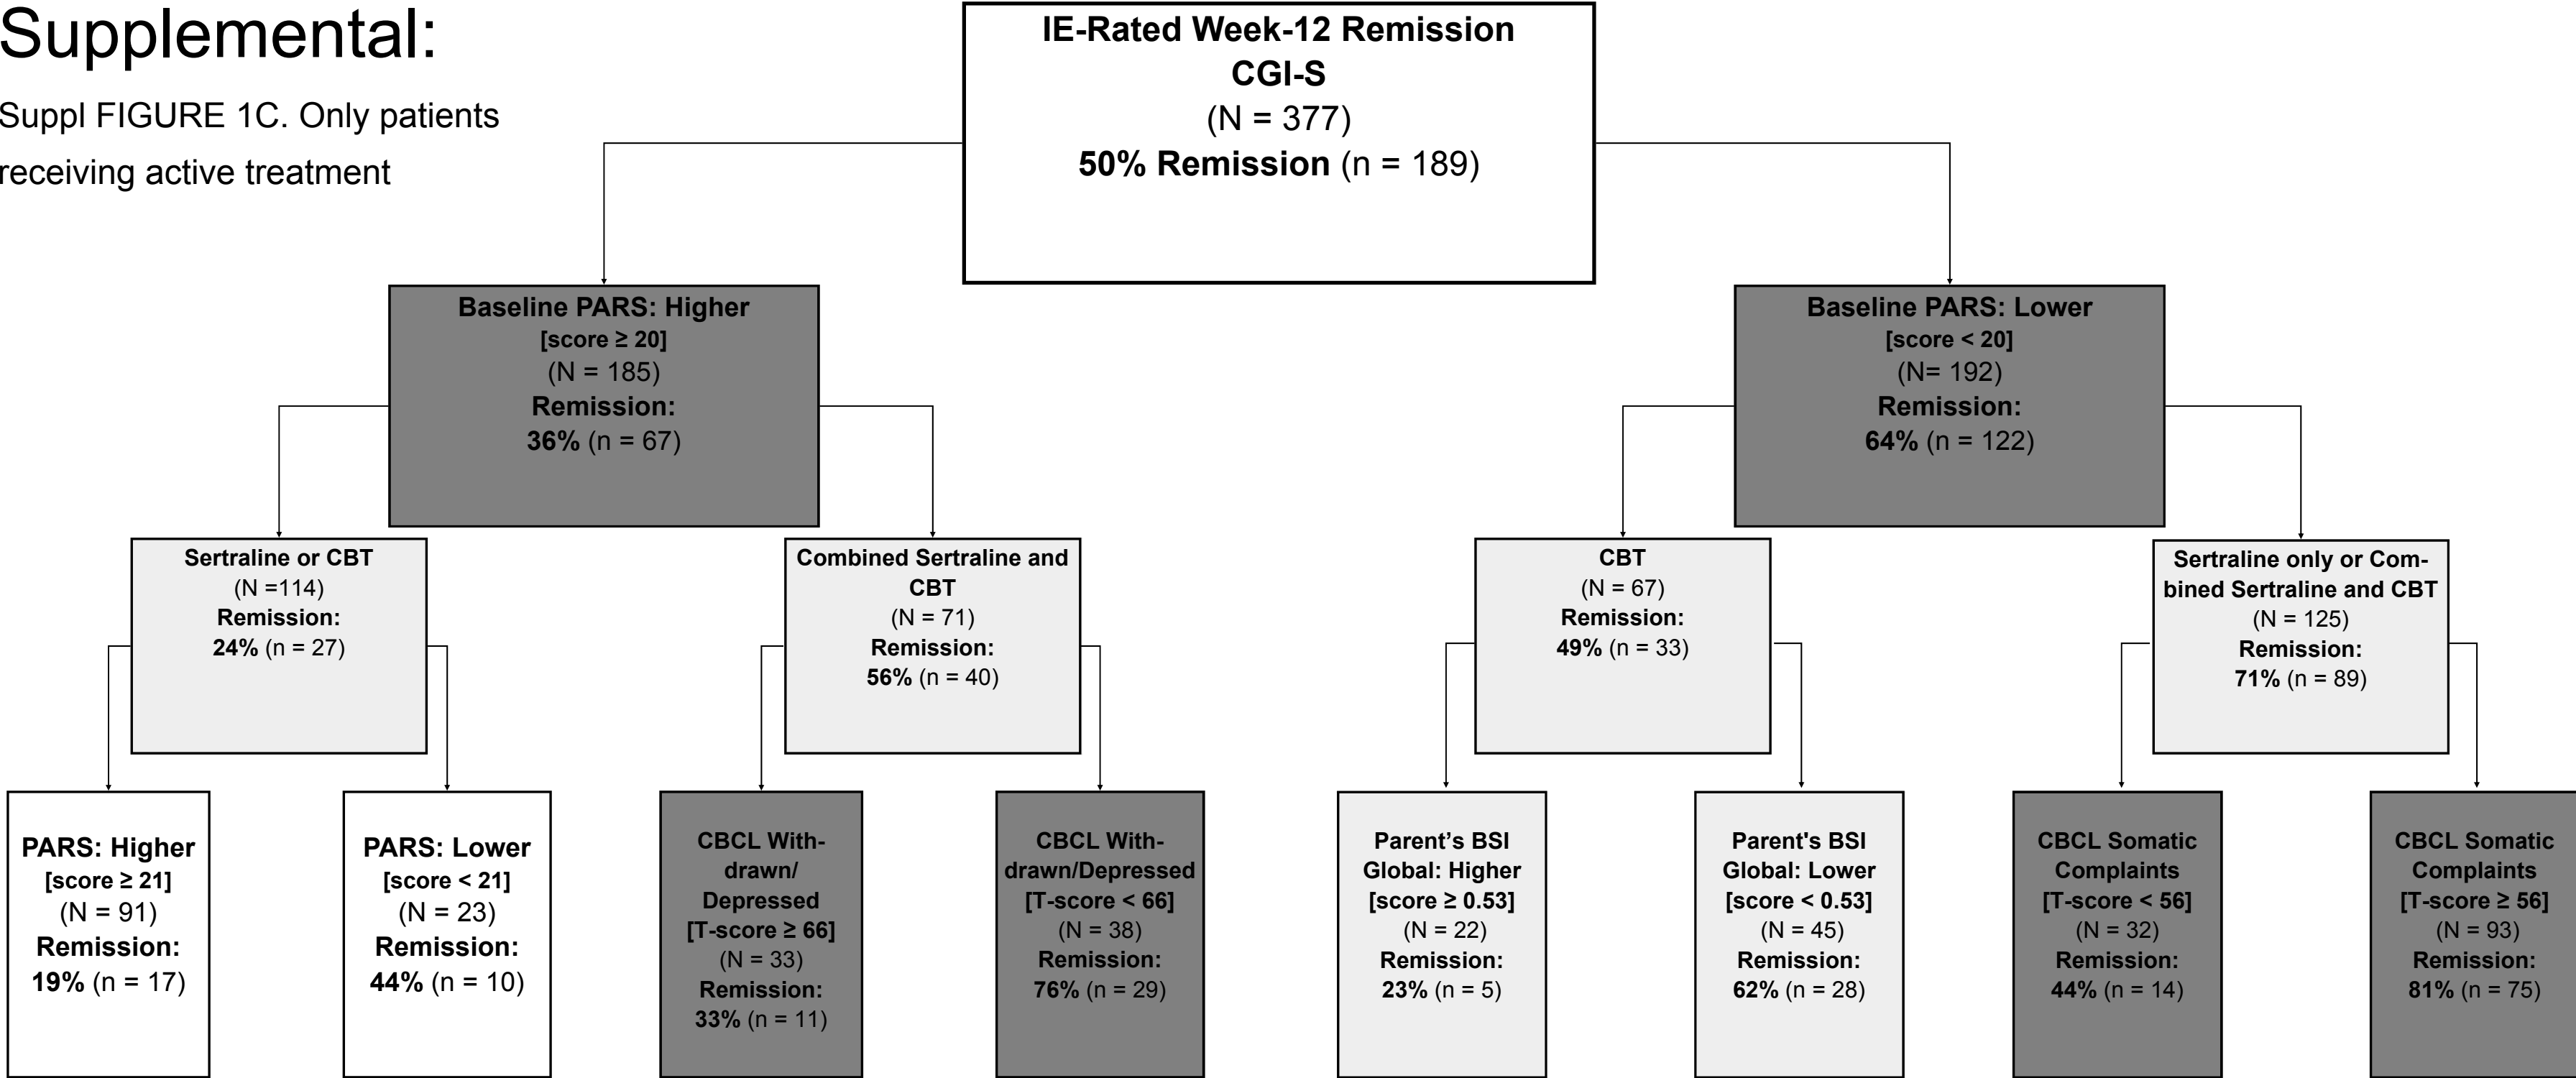

Supplement: NIHMS1508389-supplement-Supp3.pdf [file NIHMS1508389-supplement-Supp3.pdf]
